# Supplementary material for: Polymer nanoencapsulated rare earth aerogels: chemically complex but stoichiometrically similar core–shell superstructures with skeletal properties of pure compounds
Source: Royal Society of Chemistry journal article supplement (doi:10.1039/b612625a), 2007-01-01
Supplement: b612625a.pdf [file b612625a.pdf]

**Polymer Nanoencapsulated Rare Earth Aerogels:  
Chemically Complex but Stoichiometrically Similar Core-Shell Superstructures  
with Skeletal Properties of Pure Compounds**

Nicholas Leventis<sup>\*,1</sup>, Plousia Vassilaras<sup>2</sup>, Eve Fabrizio<sup>2</sup> and Amala Dass<sup>3</sup>

1. NASA Glenn Research Center, 21000 Brookpark Road, Cleveland, OH 44135
2. Ohio Aerospace Institute, 22800 Cedar Point Road, Cleveland, OH 44142
3. Department of Chemistry, University of Missouri-Rolla, Rolla, MO 65409

**Supporting Information**

**Table S1.** Physical characterization data for rare earth sol-gel materials made using epichlorohydrin as deprotonation agent.

**Table S2.** Elemental analysis data for RE xerogels, aerogels and polymer crosslinked aerogels.

**Figure S1.** CP MAS <sup>13</sup>C NMR spectra of samples as shown.

**Figure S2.** Photoluminescence data for Eu and Tb aerogels.

---

\* Current address: Department of Chemistry, University of Missouri-Rolla, Rolla, MO 65409. Tel.: 573-341-4391, Fax: 573-341-6033, E-mail: leventis@umr.edu

**Table S1.** Physical characterization data for rare earth sol-gel materials made using epichlorohydrin as deprotonation agent.

| Sample <sup>a</sup> | Diameter,<br>mm | Density, g cm <sup>-3</sup> |                                      | % Porosity,<br>v/v | BET Surface<br>Area, m <sup>2</sup> g <sup>-1</sup> <sup>d</sup> | Force at<br>Rupture, kg <sup>e</sup> | Modulus,<br>MPa <sup>e</sup> | Susceptibility,<br>emu g <sup>-1</sup> ×10 <sup>6</sup> <sup>f</sup> |
|---------------------|-----------------|-----------------------------|--------------------------------------|--------------------|------------------------------------------------------------------|--------------------------------------|------------------------------|----------------------------------------------------------------------|
|                     |                 | Bulk <sup>b</sup>           | Skeletal <sup>c</sup>                |                    |                                                                  |                                      |                              |                                                                      |
| Sc-xero             | 2.69±0.06       | 1.20±0.03                   |                                      |                    | 478(2.51)                                                        |                                      |                              | -0.2±0.0 <sub>4</sub>                                                |
| Sc-aero             | 6.12±0.28       | 0.12±0.03                   |                                      |                    | 592(6.16)                                                        |                                      |                              | -0.6±0.3                                                             |
| Sc-aeroX            | 7.98±0.53       | 0.21±0.04                   | 1.15±0.01                            | 81.7               | 242(6.62)                                                        | 1.53±0.14                            | 6.2±3.1                      | -0.6±0.1                                                             |
| Y-xero              | 3.31±0.10       | 1.49±0.09                   |                                      |                    | 431(2.76)                                                        |                                      |                              | -0.2±0.0 <sub>3</sub>                                                |
| Y-aero              | 8.57±0.14       | 0.12±0.01                   | 2.39±0.19                            | 94.9               | 528(6.25)                                                        |                                      |                              | -0.3±0.1                                                             |
| Y-aeroX             | 8.33±0.02       | 0.36±0.01                   | 1.36 <sub>1</sub> ±0.00 <sub>3</sub> | 73.5               | 144(8.10)                                                        | 5.67                                 | 22.0                         | -0.4±0.1                                                             |
| La-xero             |                 |                             |                                      |                    | 208(5.37)                                                        |                                      |                              | -0.3±0.0 <sub>3</sub>                                                |
| La-aero             |                 |                             |                                      |                    | 128(6.57)                                                        |                                      |                              | -0.1±0.0 <sub>4</sub>                                                |
| La-aeroX            | 9.84±0.68       | 0.13±0.02                   | 1.51±0.02                            | 91.4               | 70(7.85)                                                         | 0.25±0.05                            | 16.0±0.9                     | -0.4±0.1                                                             |
| Pr-xero             | 3.48±0.04       | 1.56±0.19                   |                                      |                    | 296(2.75)                                                        |                                      |                              | 21.2±0.2                                                             |
| Pr-aero             | 7.88±0.42       | 0.18±0.03                   | 2.82±0.16                            | 93.6               | 186(6.94)                                                        |                                      |                              | 17.8±2.2                                                             |
| Pr-aeroX            | 8.37±0.65       | 0.38±0.13                   | 1.41±0.03                            | 73.0               | 130(6.70)                                                        | 7.09±0.08                            | 15.1±0.4                     | 5.9±0.1                                                              |
| Nd-xero             | 3.38±0.01       | 2.09±0.10                   |                                      |                    | 307(2.60)                                                        |                                      |                              | 20.3±0.5                                                             |
| Nd-aero             | 7.73±0.24       | 0.19±0.02                   | 3.14±0.41                            | 93.9               | 384(8.54)                                                        |                                      |                              | 17.9±1.3                                                             |
| Nd-aeroX            | 8.71±0.43       | 0.46±0.06                   | 1.39±0.01                            | 66.9               | 144(12.3)                                                        | 19.09 ±4.03                          | 36.4±6.4                     | 4.2±0.2                                                              |
| Sm-xero             | 3.41±0.01       | 2.04±0.01                   |                                      |                    | 257(2.65)                                                        |                                      |                              | 3.9±0.1                                                              |
| Sm-aero             | 7.52±0.17       | 0.22±0.02                   | 2.97±0.12                            | 92.6               | 383(7.09)                                                        |                                      |                              | 5.1±0.4                                                              |
| Sm-aeroX            | 8.45±0.30       | 0.39±0.05                   | 1.39±0.01                            | 71.9               | 168(8.36)                                                        | 13.43±0.80                           | 25.9±2.6                     | 0.7±0.0 <sub>2</sub>                                                 |
| Eu-xero             | 3.20±0.05       | 2.11±0.05                   |                                      |                    | 300(2.65)                                                        |                                      |                              | 18.5±0.4                                                             |
| Eu-aero             | 7.61±0.32       | 0.20±0.02                   | 2.47±0.14                            | 91.9               | 379(6.17)                                                        |                                      |                              | 16.6±1.5                                                             |
| Eu-aeroX            | 7.70±0.68       | 0.53±0.08                   | 1.42±0.03                            | 62.7               | 144(8.54)                                                        | 14.34                                | 13.6                         | 5.2±0.2                                                              |
| Gd-xero             | 3.38±0.02       | 2.02±0.02                   |                                      |                    | 294(2.63)                                                        |                                      |                              | 101.6±3.7                                                            |

## Supplementary Material (ESI) for Journal of Materials Chemistry

This journal is (c) The Royal Society of Chemistry 2007

|          |           |           |           |      |           |            |          |           |
|----------|-----------|-----------|-----------|------|-----------|------------|----------|-----------|
| Gd-aero  | 8.04±0.36 | 0.18±0.02 | 3.14±0.24 | 94.3 | 383(5.80) |            |          | 90.8±1.3  |
| Gd-aeroX | 8.17±0.21 | 0.44±0.01 | 1.40±0.03 | 68.6 | 171(8.47) | 10.90±2.26 | 28.5±5.2 | 30.6±0.3  |
| Tb-xero  | 3.48±0.02 | 1.96±0.02 |           |      |           |            |          | 145.3±2.1 |
| Tb-aero  | 7.65±0.38 | 0.20±0.01 | 3.32±0.31 | 94.0 | 365(7.06) |            |          | 130.5±5.9 |
| Tb-aeroX | 8.30±0.14 | 0.42±0.03 | 1.40±0.01 | 70.0 | 160(8.34) | 6.30±0.73  | 29.6±7.5 | 43.6±0.4  |
| Dy-xero  | 3.44±0.06 | 2.00±0.12 |           |      | 295(2.67) |            |          | 181.7±3.2 |
| Dy-aero  | 8.02±0.09 | 0.18±0.01 | 3.02±0.13 | 94.0 | 366(6.75) |            |          | 167.6±3.5 |
| Dy-aeroX | 8.16±0.06 | 0.46±0.06 | 1.44±0.01 | 68.1 | 176(6.69) | 2.62±0.28  | 20.5±3.2 | 59.2±3.1  |
| Ho-xero  | 3.39±0.12 | 2.13±0.04 |           |      | 278(2.63) |            |          | 167.5±4.5 |
| Ho-aero  | 7.57±0.18 | 0.21±0.01 | 2.47±0.22 | 91.5 | 358(8.16) |            |          | 139.1±7.0 |
| Ho-aeroX | 8.35±0.20 | 0.42±0.03 | 1.41±0.02 | 70.2 | 177(14.9) | 6.57±1.31  | 19.3±1.3 | 54.8±3.4  |
| Er-xero  | 3.43±0.02 | 2.04±0.05 |           |      | 299(2.67) |            |          | 133.2±4.2 |
| Er-aero  | 8.36±0.25 | 0.16±0.01 | 3.28±0.26 | 95.1 | 368(6.87) |            |          | 104.5±5.4 |
| Er-aeroX | 8.41±0.34 | 0.40±0.05 | 1.14±0.01 | 64.9 | 157(6.36) | 13.65±1.41 | 16.4±2.8 | 43.9±0.3  |
| Tm-xero  | 3.38±0.02 | 1.96±0.09 |           |      | 312(2.73) |            |          | 84.5±4.2  |
| Tm-aero  | 8.63±0.57 | 0.14±0.02 | 3.17±0.12 | 95.6 | 349(6.91) |            |          | 66.2±1.7  |
| Tm-aeroX | 8.59±0.04 | 0.34±0.01 | 1.44±0.01 | 76.4 | 170(13.6) | 5.65±0.75  | 9.8±1.4  | 31.1±1.1  |
| Yb-xero  | 3.53±0.03 | 1.73±0.15 |           |      | 323(2.71) |            |          | 28.1±0.2  |
| Yb-aero  | 8.43±0.08 | 0.15±0.01 | 3.25±0.16 | 95.4 | 345(6.33) |            |          | 31.2±1.9  |
| Yb-aeroX | 8.38±0.12 | 0.38±0.01 | 1.49±0.01 | 74.5 |           |            |          | 10.9±0.4  |
| Lu-xero  | 3.49±0.03 | 1.96±0.05 |           |      |           |            |          | 0.08±0.04 |
| Lu-aero  | —         | —         | —         |      | 214(8.17) |            |          | 0.1±0.3   |
| Lu-aeroX | 8.35±0.07 | 0.39±0.02 | 1.49±0.02 | 73.8 | 120(6.97) | 7.25±0.30  | 18.7±5.1 | 0.9±0.04  |

a. "X" stands for polymer crosslinked samples; b. from the sample volume and weight; c. by He pycnometry; d. by N<sub>2</sub> sorption porosimetry (numbers in parentheses are average pore diameters in nm by the BJH-desorption method); e. by a short beam three-point flexural bending test

method; aerogels were too weak to test accurately, xerogels were too short; f. using a Johnson Matthey Mark I magnetic susceptibility balance with tightly packed powders of the samples.

**Table S2.** Elemental analysis data for RE xerogels, aerogels and polymer crosslinked aerogels.<sup>a</sup>

| Sample (% water) <sup>b</sup> | Elemental Analysis (%w/w) <sup>c,d</sup> |      |      |          |                               |                                |  |
|-------------------------------|------------------------------------------|------|------|----------|-------------------------------|--------------------------------|--|
|                               | C                                        | H    | N    | Metal    | CO <sub>3</sub> <sup>2-</sup> | Cl <sub>Total</sub> (Chloride) |  |
| Sc-xero                       | 17.71                                    | 3.32 | 1.69 | 34.4±0.3 | 2.0                           | 5.2 (3.0)                      |  |
| Sc-aero (14.1)                |                                          |      |      | 32.6     | 4.4                           | 3.9                            |  |
| Sc-aeroX                      |                                          |      |      | 8.2      | 3.6                           |                                |  |
| Y-xero                        | 11.88                                    | 2.77 | 0.91 | 46.4±0.2 | 2.6                           | 8.0±0.2 (4.1)                  |  |
| Y-aero (10.3)                 |                                          |      |      | 44.9     | 12.8                          | 7.6 (6.8)                      |  |
| Y-aeroX                       |                                          |      |      | 13.0     | 5.3                           |                                |  |
| La(PO)-xero                   | 3.59                                     | 1.26 | 0.36 | 59.3     | 2.61                          | 14.2 (7.7)                     |  |
| La(PO)-aero                   | 16.39                                    | 2.82 | 4.70 | 45.4     | 2.18                          | 8.6 (6.1)                      |  |
| La-aeroX                      |                                          |      |      | 31.0     | 1.69                          |                                |  |
| Pr-xero                       | 8.28                                     | 1.83 | 0.63 | 57.2±1.7 | 2.8±1.1                       | 9.2±0.6 (8.0)                  |  |
| Pr-aero (7.9)                 |                                          |      |      | 54.8±0.5 | 13.0                          | 8.5±0.5 (6.0)                  |  |
| Pr-aeroX                      |                                          |      |      | 18.3     | 5.70                          |                                |  |
| Nd-xero                       | 8.40                                     | 1.85 | 0.86 | 58.1±1.3 | 2.5±0.6                       | 7.9±0.5 (7.3)                  |  |
| Nd-aero (7.45)                |                                          |      |      | 56.2±0.6 | 10.8                          | 7.2±0.2 (6.4)                  |  |
| Nd-aeroX                      |                                          |      |      | 20.1     | 4.20                          |                                |  |
| Sm-xero                       | 8.11                                     | 1.93 | 0.79 | 56.4±0.2 | 2.3±0.8                       | 6.8±0.2 (4.9)                  |  |
| Sm-aero (8.01)                |                                          |      |      | 55.2±0.9 | 10.4                          | 6.2±0.1 (5.9)                  |  |
| Sm-aeroX                      |                                          |      |      | 18.1     | 5.2                           |                                |  |
| Eu-xero                       | 5.17                                     | 1.51 | 0.43 | 62.1±2.9 | 4.3±0.3                       | 7.3±0.6 (3.4)                  |  |

Eu-aero (8.55) 56.7 11.3 5.6 (5.2)  
 Eu-aeroX 19.0 2.29

**Table S2 (continued)**

| Sample (% water) <sup>b</sup> | Elemental Analysis (%w/w) <sup>c,d</sup> |      |      |          |                               |                                |
|-------------------------------|------------------------------------------|------|------|----------|-------------------------------|--------------------------------|
|                               | C                                        | H    | N    | Metal    | CO <sub>3</sub> <sup>2-</sup> | Cl <sub>Total</sub> (Chloride) |
| Gd-xero                       | 8.87                                     | 1.92 | 0.73 | 59.4±0.5 | 4.6±0.5                       | 6.2±0.4 (3.5)                  |
| Gd-aero (7.81)                |                                          |      |      | 59.1±0.5 | 9.6                           | 5.5±0.3 (5.1)                  |
| Gd-aeroX                      |                                          |      |      | 20.6     | 5.79                          |                                |
| Tb-xero                       | 9.12                                     | 1.94 | 0.81 | 57.1±0.9 | 2.8±0.4                       | 5.8±0.1 (3.3)                  |
| Tb-aero (9.12)                |                                          |      |      | 55.3±2.2 | 8.97                          | 5.3±0.1 (4.6)                  |
| Tb-aeroX                      |                                          |      |      | 19.1     | 3.90                          |                                |
| Dy-xero                       | 4.41                                     | 1.51 | 0.38 | 63.1±2.9 | 4.6±0.6                       | 5.8±0.9 (3.3)                  |
| Dy-aero (6.29)                |                                          |      |      | 59.2±0.1 | 7.42                          | 4.9±0.3 (4.1)                  |
| Dy-aeroX                      |                                          |      |      | 21.0     | 4.72                          |                                |
| Ho-xero (1.45)                | 4.93                                     | 1.51 | 0.36 | 59.7±2.3 | 2.5±1.1                       | 5.1±1.0 (2.6)                  |
| Ho-aero (6.94)                |                                          |      |      | 57.5     | 9.63                          | 4.3                            |
| Ho-aeroX                      |                                          |      |      | 20.6     | 4.28                          |                                |
| Er-xero                       | 8.27                                     | 1.87 | 0.53 | 60.9±1.3 | 5.2±0.5                       | 5.7±0.0 (3.2)                  |
| Er-aero (5.88)                |                                          |      |      | 59.9±0.2 | 7.50                          | 4.8±0.2 (4.0)                  |
| Er-aeroX                      |                                          |      |      | 22.4     | 5.34                          |                                |
| Tm-xero                       | 6.93                                     | 1.81 | 0.29 | 61.1±0.8 | 2.4±1.3                       | 4.8±0.4 (2.7)                  |
| Tm-aero (6.61)                |                                          |      |      | 59.5±1.3 | 6.43                          | 4.7±0.2 (4.0)                  |
| Tm-aeroX                      |                                          |      |      | 21.8     | 4.75                          |                                |

|                |      |      |      |          |         |               |
|----------------|------|------|------|----------|---------|---------------|
| Yb-xero        | 7.49 | 1.82 | 0.49 | 63.3±1.7 | 6.0±2.2 | 4.9±0.6 (2.8) |
| Yb-aero (5.39) |      |      |      | 62.1±2.2 | 9.06    | 4.6±0.1       |
| Yb-aeroX       |      |      |      | 21.9     | 1.96    |               |

**Table S2 (continued)**

| Sample (% water) <sup>b</sup> | Elemental Analysis (%w/w) <sup>c,d</sup> |      |      |          |                               |                                |
|-------------------------------|------------------------------------------|------|------|----------|-------------------------------|--------------------------------|
|                               | C                                        | H    | N    | Metal    | CO <sub>3</sub> <sup>2-</sup> | Cl <sub>Total</sub> (Chloride) |
| Lu-xero                       | 4.45                                     | 1.56 | 0.55 | 63.0±2.8 | 2.9±0.1                       | 4.9±0.6 (2.3)                  |
| Lu-aero (10.35)               |                                          |      |      | 60.2     | 4.03                          | 4.4                            |
| Lu-aeroX                      |                                          |      |      | 23.7     | 3.03                          |                                |

**Table 1S footnotes**

- RE analysis: Samples were prepared by dissolving 50 mg of sol-gel material in 1:1 HNO<sub>3</sub> under mild heating, followed by dilution to 100 mL with DI water. The RE element was determined on multiple emission lines using an Inductively Coupled Plasma Emission Spectrometer (Varian Vista-Pro). Carbonate analysis was conducted gravimetrically by NSL Analytical Inc. (7650 Hub Parkway, Cleveland, OH 44125) according to ASTM-D 460 Section 61-64 (Modified).
- Numbers in parentheses is the % w/w water lost by heating at 105 °C for 24 h.
- On a dry basis.
- Wherever there is error information, analysis was conducted twice with different samples processed 6-9 months apart from one another.

Supplementary Material (ESI) for Journal of Materials Chemistry  
This journal is (c) The Royal Society of Chemistry 2007

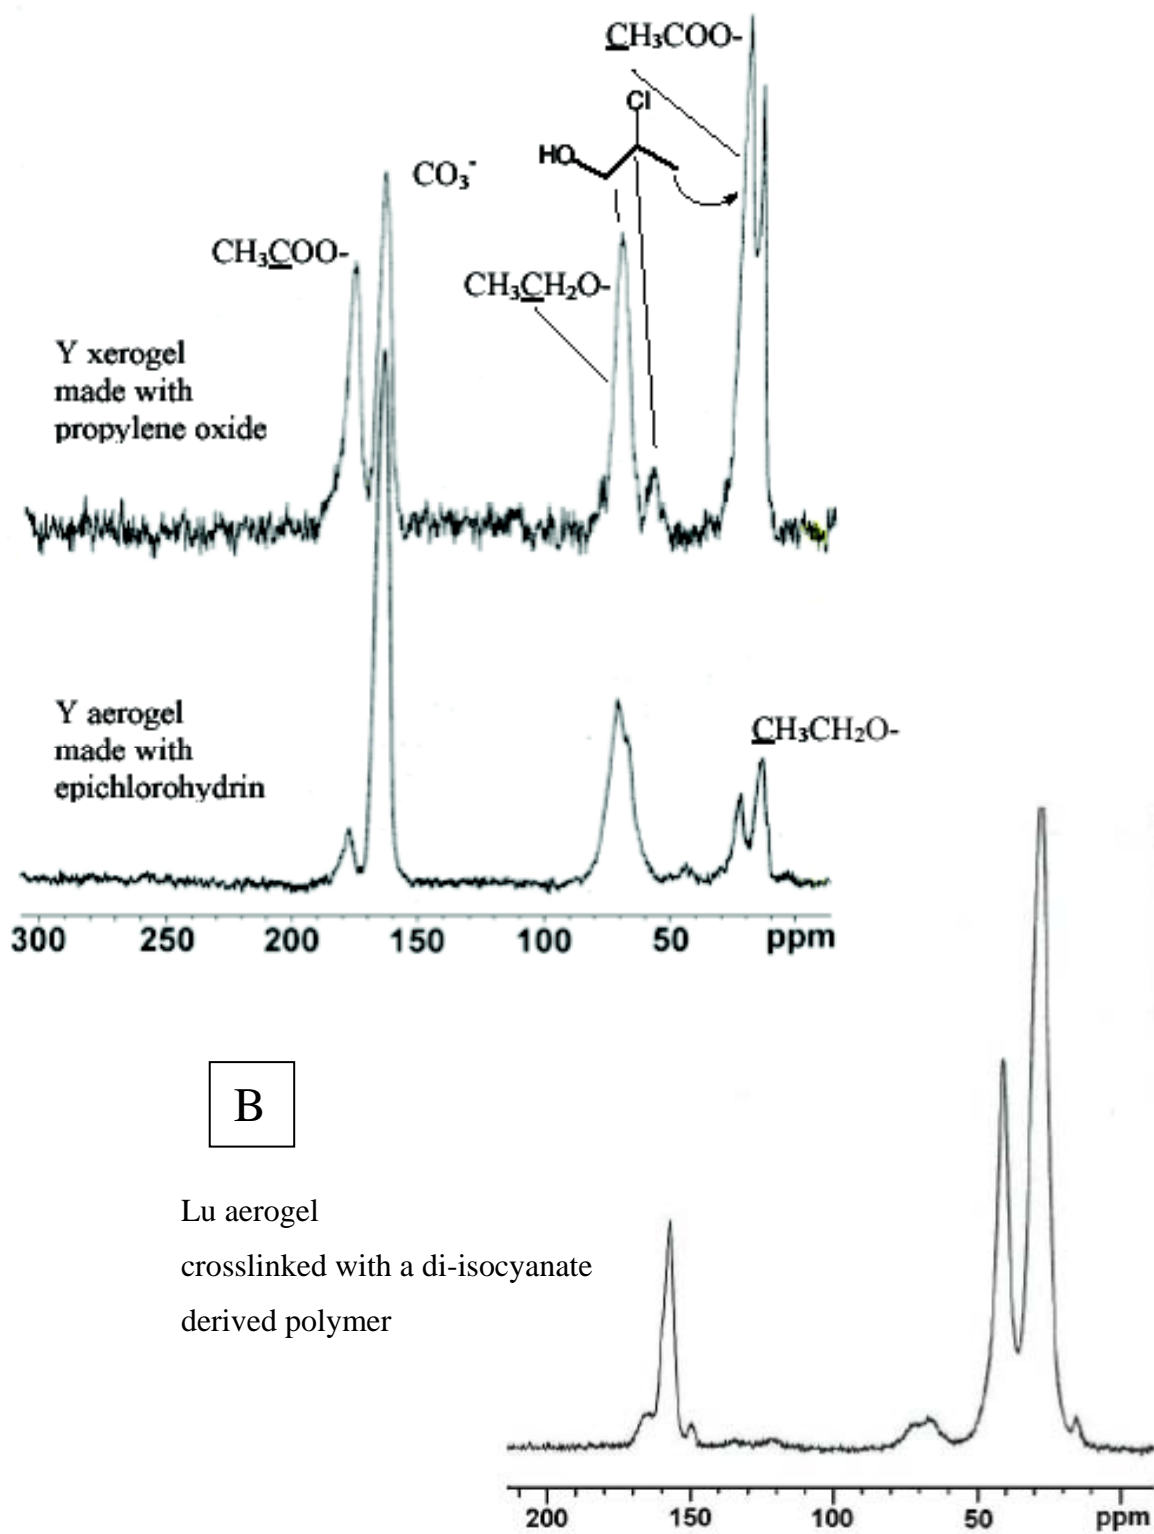

**Figure S1.** CP MAS  $^{13}\text{C}$  NMR spectra of samples as shown.



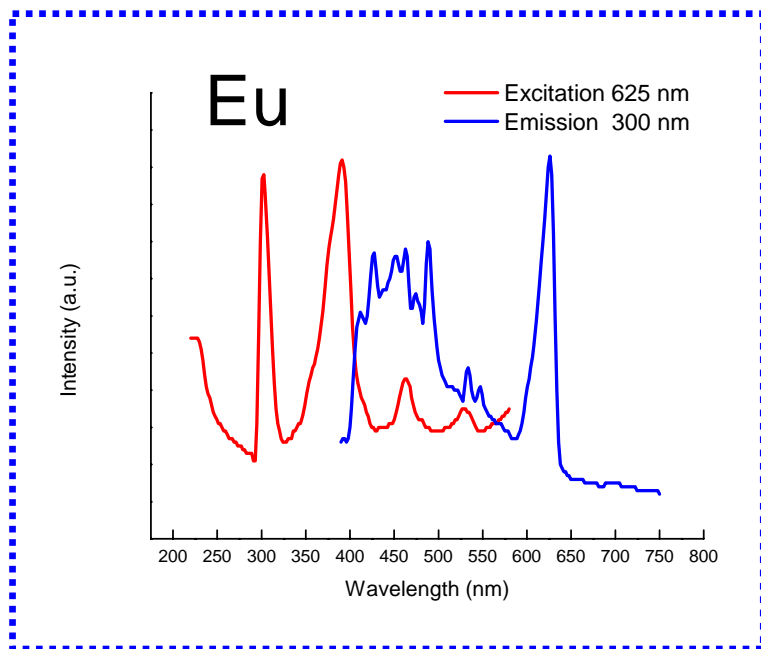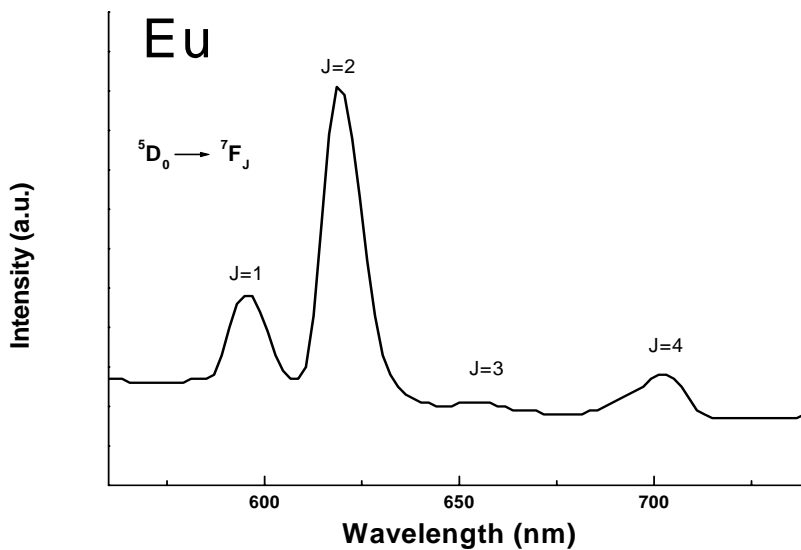

**Figure S2-A.** Photoluminescence data for Eu aerogels. Top: In red, excitation spectrum with  $\lambda_{em}=625$  nm. Two major maxima are identified at 300 nm and at 390 nm. In blue,

emission spectrum with excitation at 300 nm. Bottom: Emission spectrum with excitation at 390 nm.

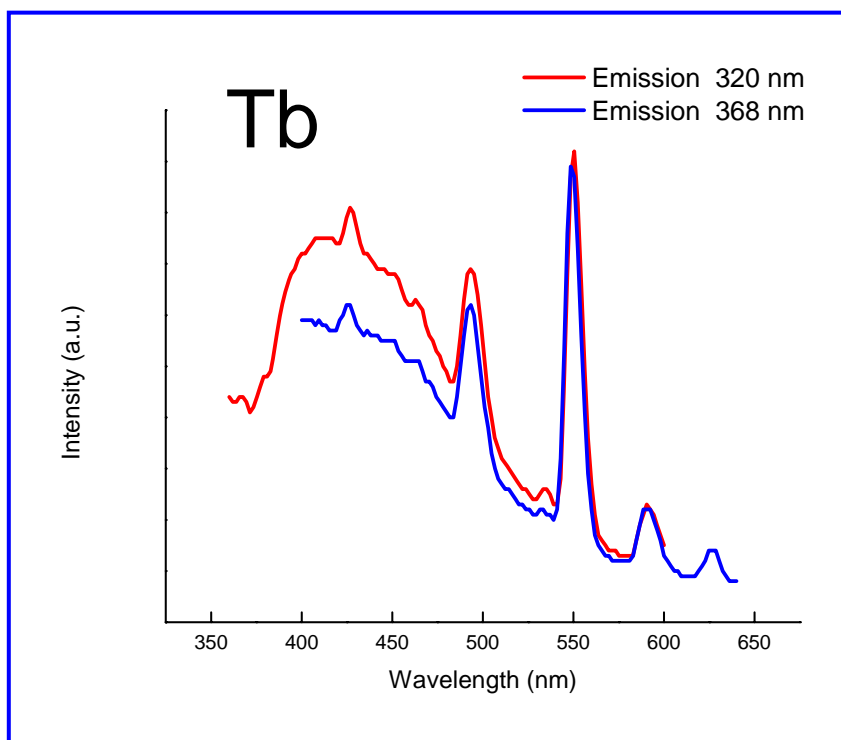

**Figure S2-B.** Photoluminescence data for Tb aerogels. Emission spectra (both colors) after excitation at the wavelengths indicated.
